# Supplementary material for: Intravenous Delivery of Targeted Liposomes to Amyloid-β Pathology in APP/PSEN1 Transgenic Mice
Source: PubMed Central journal article supplement (PMC3485335; doi:10.1371/journal.pone.0048515), 2012-10-31
Supplement: pone.0048515.s001.pdf [file pone.0048515.s001.pdf]

## **Intravenous Delivery of Targeted Liposomes to Amyloid- $\beta$ Plaques in APP/PSEN1 Transgenic Mice**

**Eric A. Tanifum,<sup>1</sup>† Indrani Dasgupta,<sup>2</sup>† Mayank Srivastava,<sup>1</sup>† Rohan C. Bhavane,<sup>1</sup>† Li Sun,<sup>3</sup> John Berridge,<sup>3</sup> Hoda Pourgarzham,<sup>3</sup> Rashmi Kamath,<sup>1</sup> Gabriela Espinosa,<sup>1</sup> Stephen C. Cook,<sup>4</sup> Ananth Annapragada,<sup>1</sup>† Jason L. Eriksen<sup>2</sup>\***

*<sup>1</sup>Pediatric Radiology, Texas Children's Hospital, Houston, TX 77030*

*<sup>2</sup>School of Biomedical Informatics, The University of Texas Health Science Center at Houston, Houston, TX 77030*

*<sup>3</sup>Department of Pharmacology and Pharmaceutical Sciences, University of Houston, Houston, TX 77204*

*<sup>4</sup>Alzeca Biosciences, Houston, TX 770098*

*†Current address: Department of Anatomy & Neurobiology, University of Maryland School of Medicine, Baltimore, MD 21201*

*‡Formerly of School of Biomedical Informatics, The University of Texas Health Science Center at Houston, Houston, TX 77030*

*\*Corresponding authors: [avannapr@texaschildrens.org](mailto:avannapr@texaschildrens.org) and [jeriksen@central.uh.edu](mailto:jeriksen@central.uh.edu)*

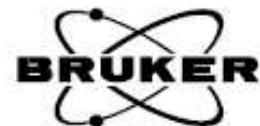

Current Data Parameters  
NAME KI4\_72  
EXPNO 1  
PROCNO 1

F2 - Acquisition Parameters  
Date\_ 20110119  
Time 11.52  
INSTRUM spect  
PROBHD 5 mm TXI 1H/D-  
PULPROG zg30  
ID 65536  
SOLVENT CDCl3  
NS 16  
DS 2  
SWH 10330.578 Hz  
FIDRES 0.157632 Hz  
AQ 3.1720407 sec  
RG 16  
DW 48.400 usec  
DE 6.00 usec  
TE 301.2 K  
D1 1.00000000 sec  
TD0 1

----- CHANNEL f1 -----  
NUC1 1H  
P1 8.65 usec  
PL1 -2.00 dB  
SFO1 500.1330885 MHz

F2 - Processing parameters  
SI 32768  
SF 500.1300129 MHz  
WIM KM  
SSB 0  
LB 0.30 Hz  
GB 0  
PC 1.00

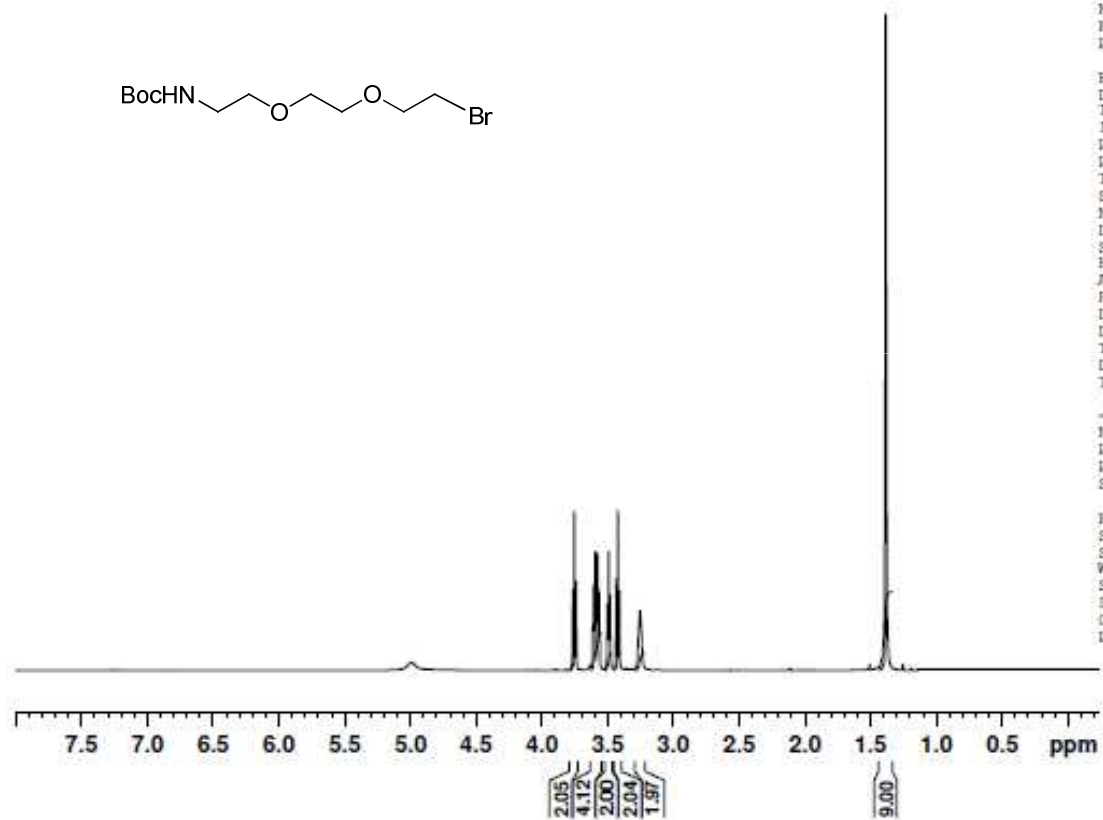

Figure S1. <sup>1</sup>H NMR of compound 3

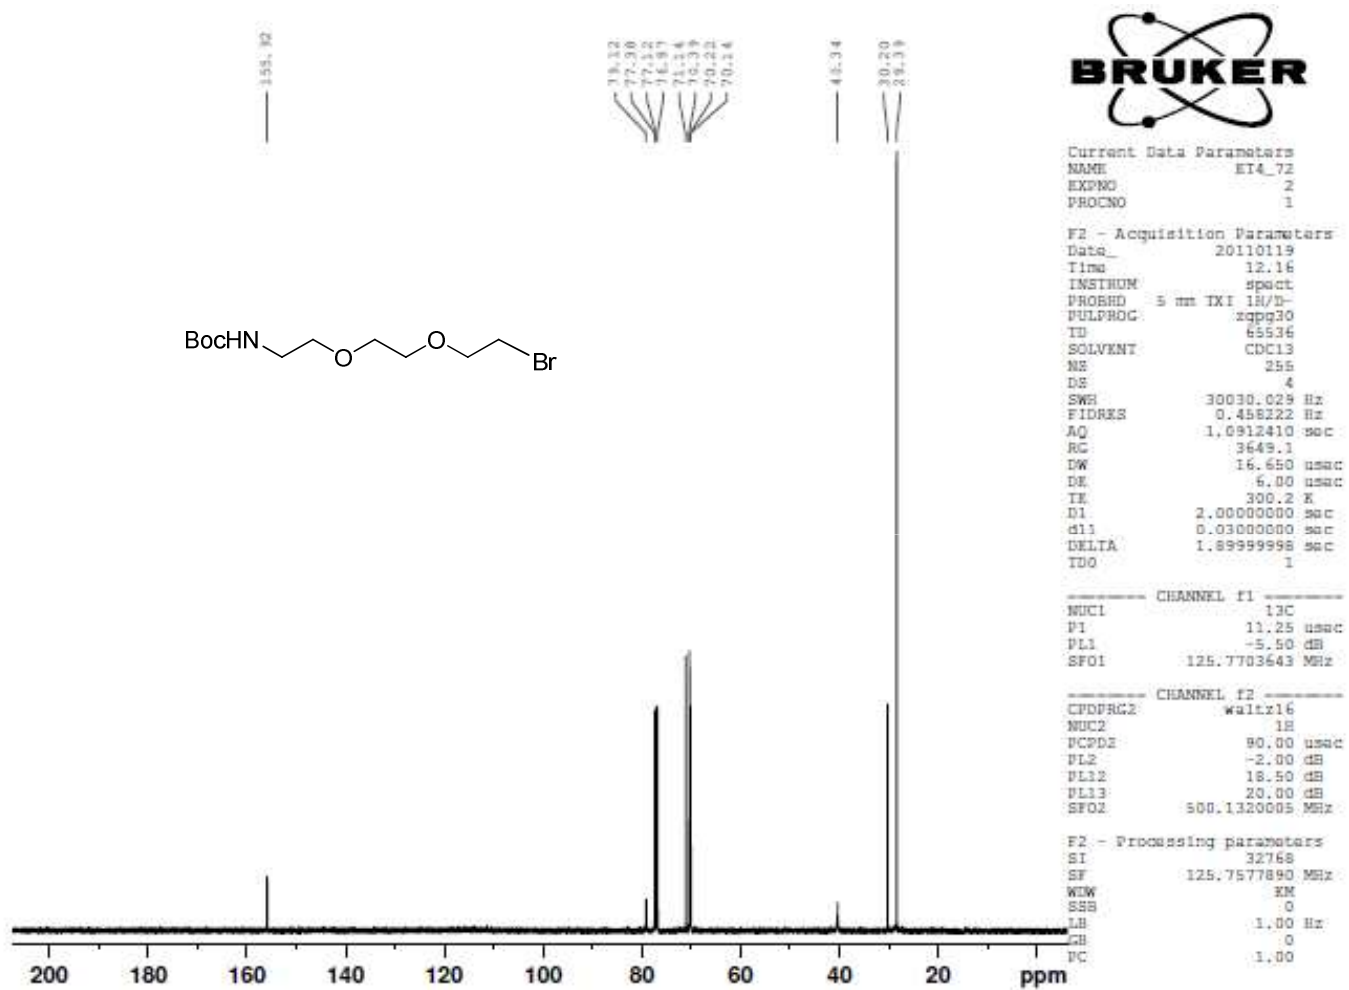

**Figure S2.**  $^{13}\text{C}$  NMR of compound 3

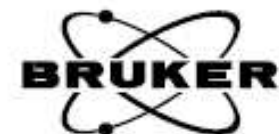

Current Data Parameters  
NAME ET4\_44  
EXPNO 1  
PROCNO 1

F2 - Acquisition Parameters  
Date\_ 20100902  
Time 10.49  
INSTRUM spect  
PROBHD 5 mm TXI 1H/D-  
PULPROG zg30  
TD 65536  
SOLVENT CDCl3  
NS 16  
DS 2  
SWH 10330.578 Hz  
FIDRES 0.157632 Hz  
AQ 3.1720407 sec  
RG 64  
DW 48.400 usec  
DE 7.50 usec  
TE 300.2 K  
D1 1.0000000 sec  
TD0 1

----- CHANNEL f1 -----  
NUC1 1H  
P1 8.75 usec  
PL1 -2.00 dB  
SFO1 500.1330885 MHz

F2 - Processing parameters  
SI 32768  
SF 500.1300131 MHz  
WDW EM  
SSB 0  
LB 0.30 Hz  
GB 0  
PC 1.00

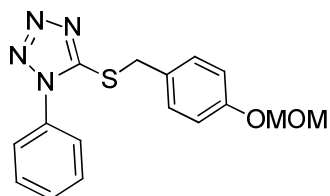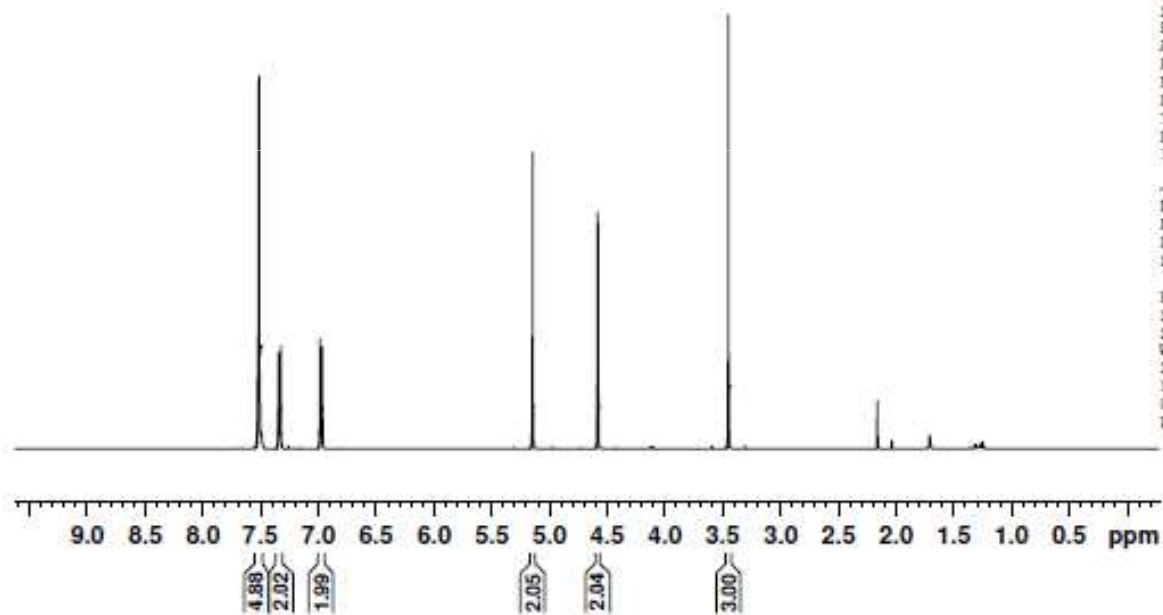

Figure S3. <sup>1</sup>H NMR of compound 6

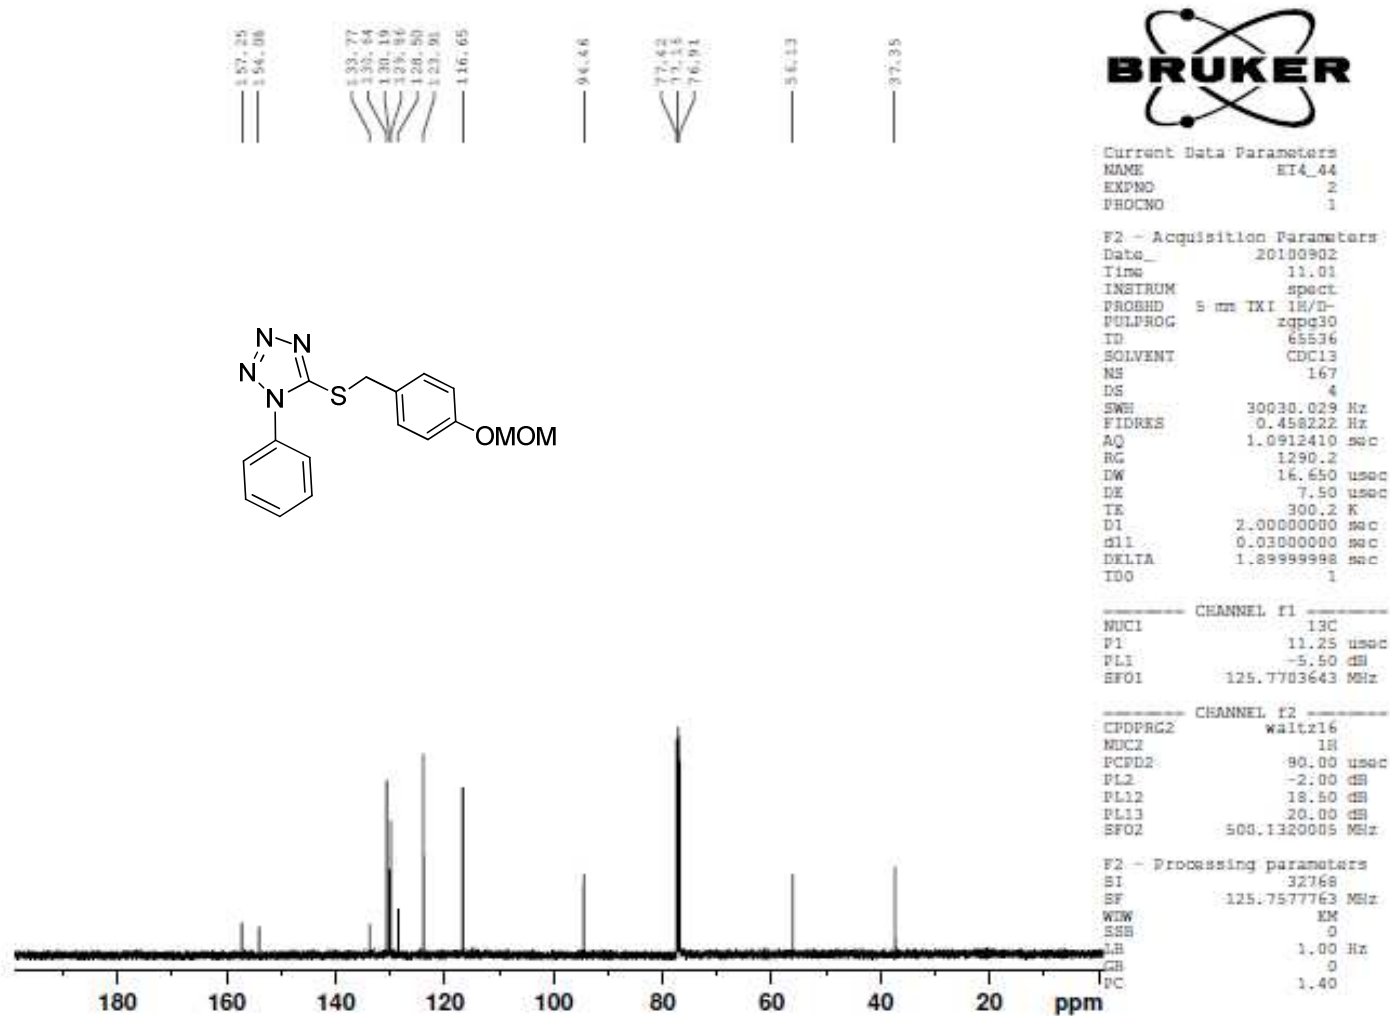

**Figure S4.** <sup>13</sup>C NMR of compound 6

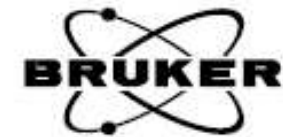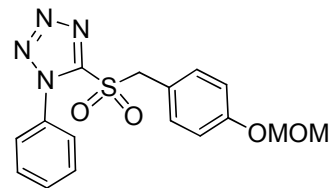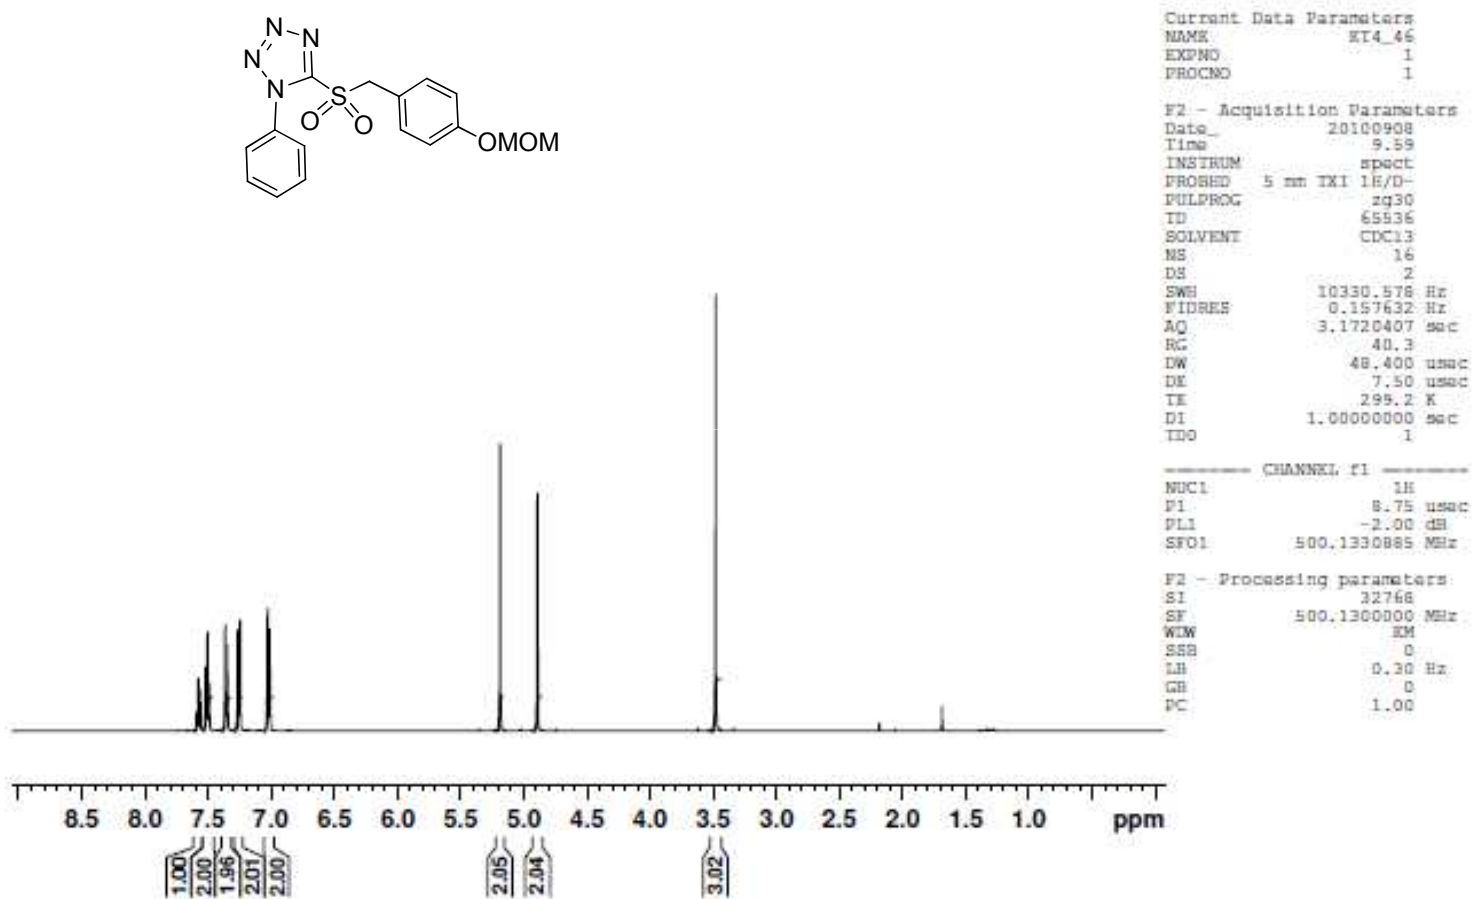

Figure S5. <sup>1</sup>H NMR of compound 7

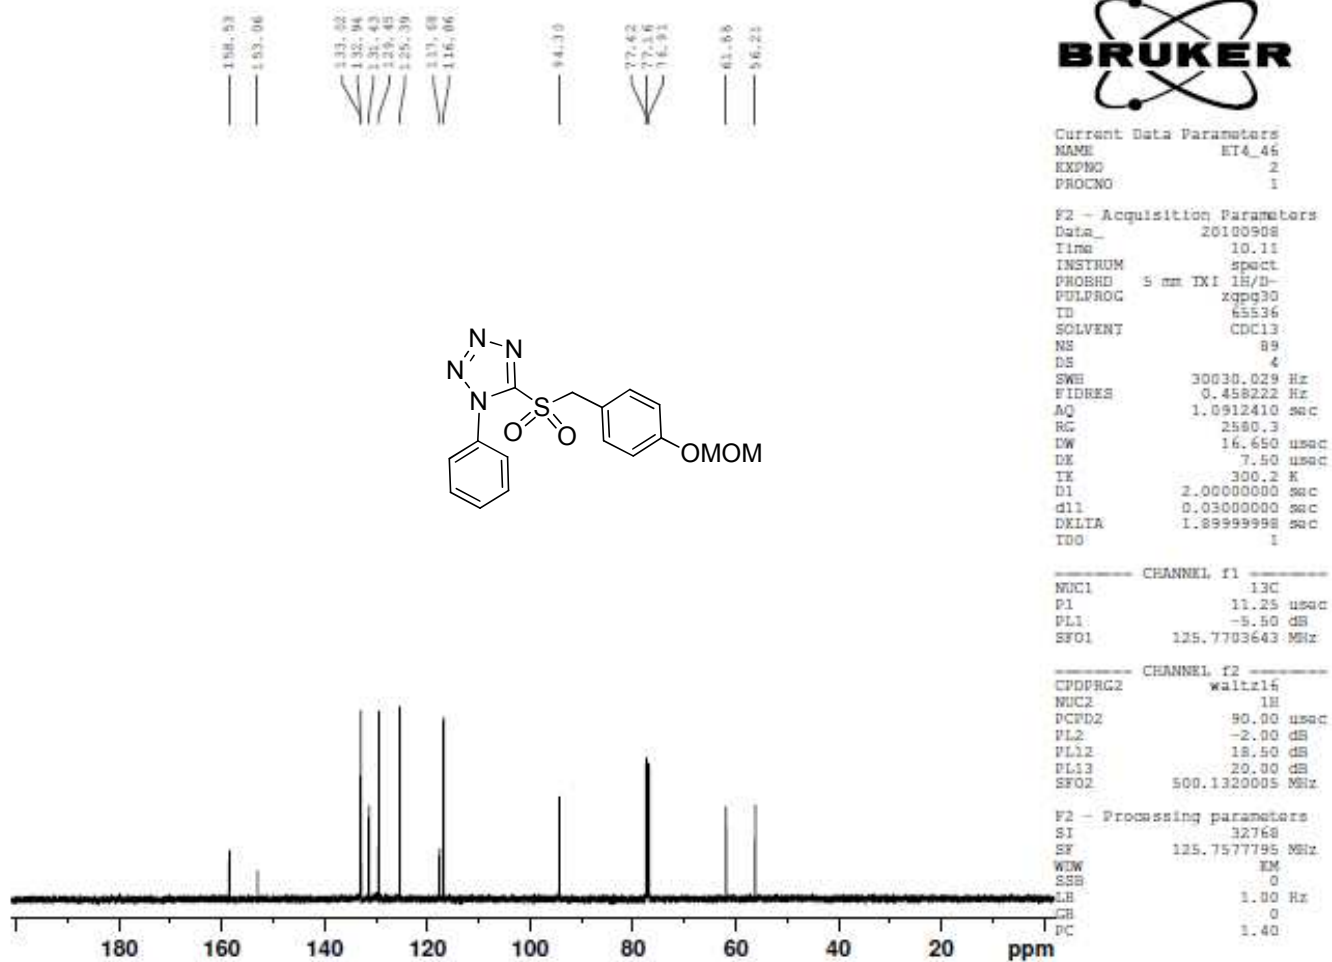

**Figure S6.** <sup>13</sup>C NMR of compound 7

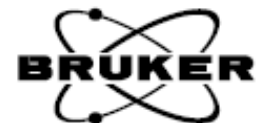

Current Data Parameters  
NAME KI4-23  
EXPNO 1  
PROCNO 1

F2 - Acquisition Parameters  
Date\_ 20100714  
Time 11.57  
INSTRUM spect  
PROBHD 5 mm QNP 1H/19  
PULPROG zg30  
TD 65536  
SOLVENT DMSO  
NS 3  
DS 2  
SWH 6172.839 Hz  
FIDRES 0.094190 Hz  
AQ 5.3084660 sec  
RG 161.3  
DW 81.000 usec  
DE 6.00 usec  
TE 298.2 K  
D1 1.00000000 sec  
TD0 1

CHANNEL f1  
NUC1 1H  
P1 10.25 usec  
PL1 -1.00 dB  
SFO1 300.1318534 MHz

F2 - Processing parameters  
SI 32768  
SF 300.1300000 MHz  
WDW EM  
SSB 0  
LB 0.30 Hz  
GB 0  
PC 1.00

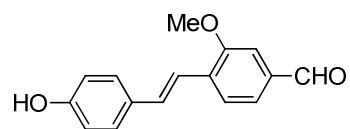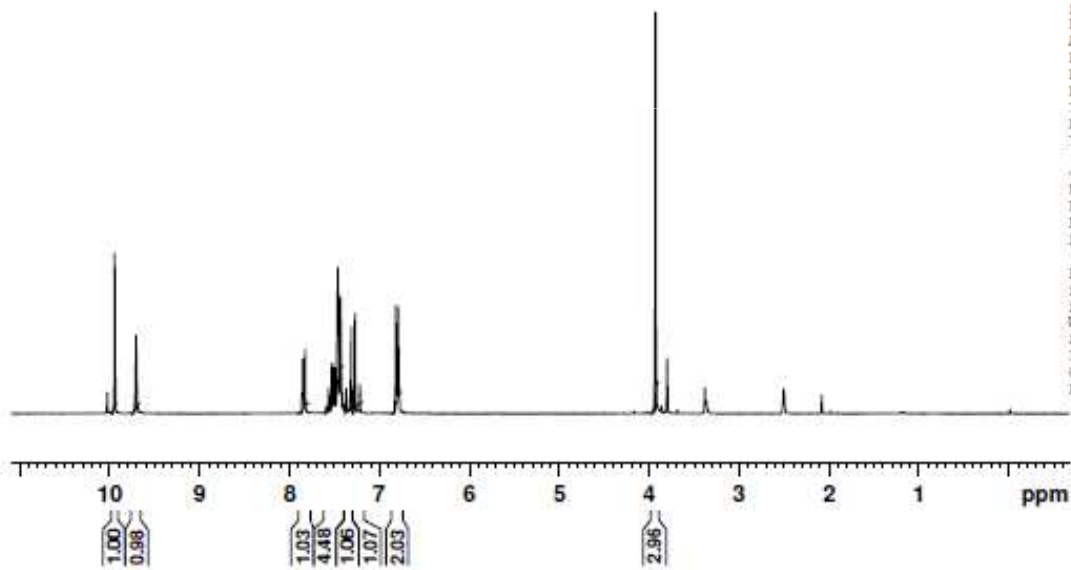

Figure S7. <sup>1</sup>H NMR of compound 10



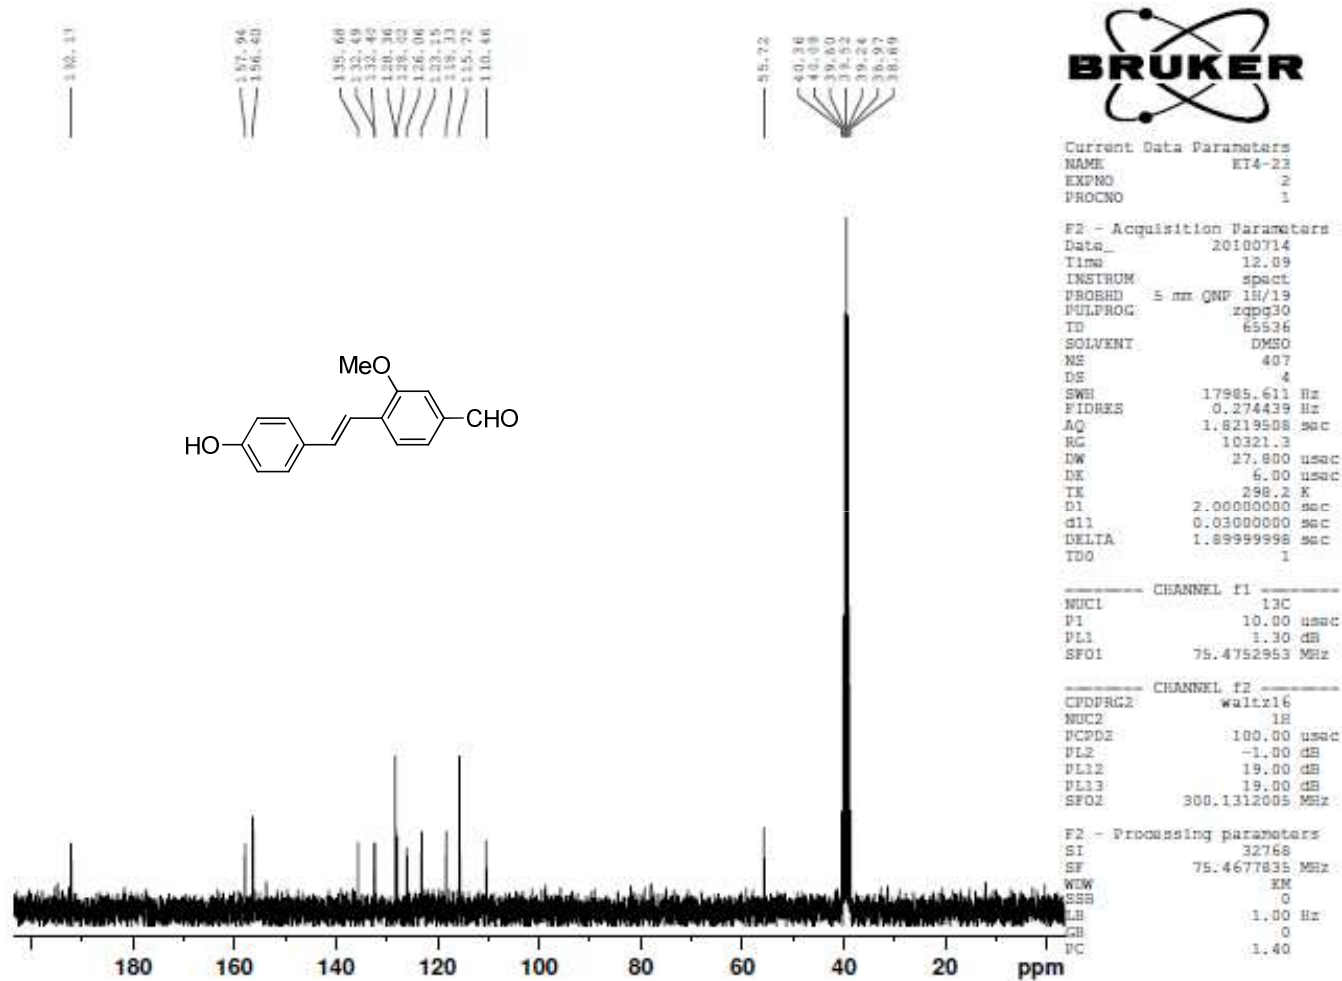

**Figure S8.**  $^{13}\text{C}$  NMR of compound 10

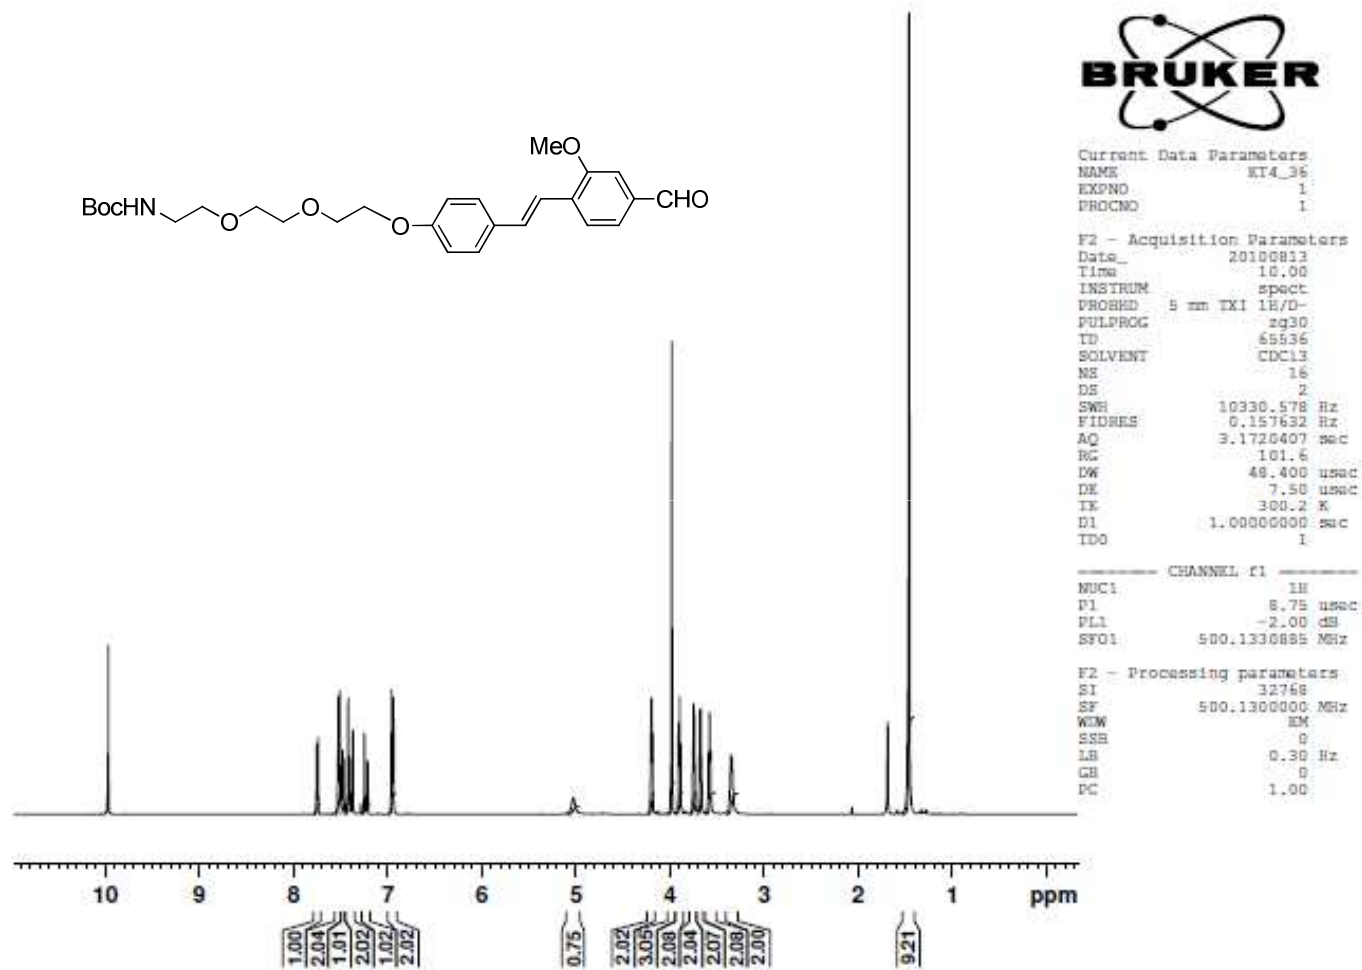

**Figure S9.**  $^1\text{H}$  NMR of compound **11**

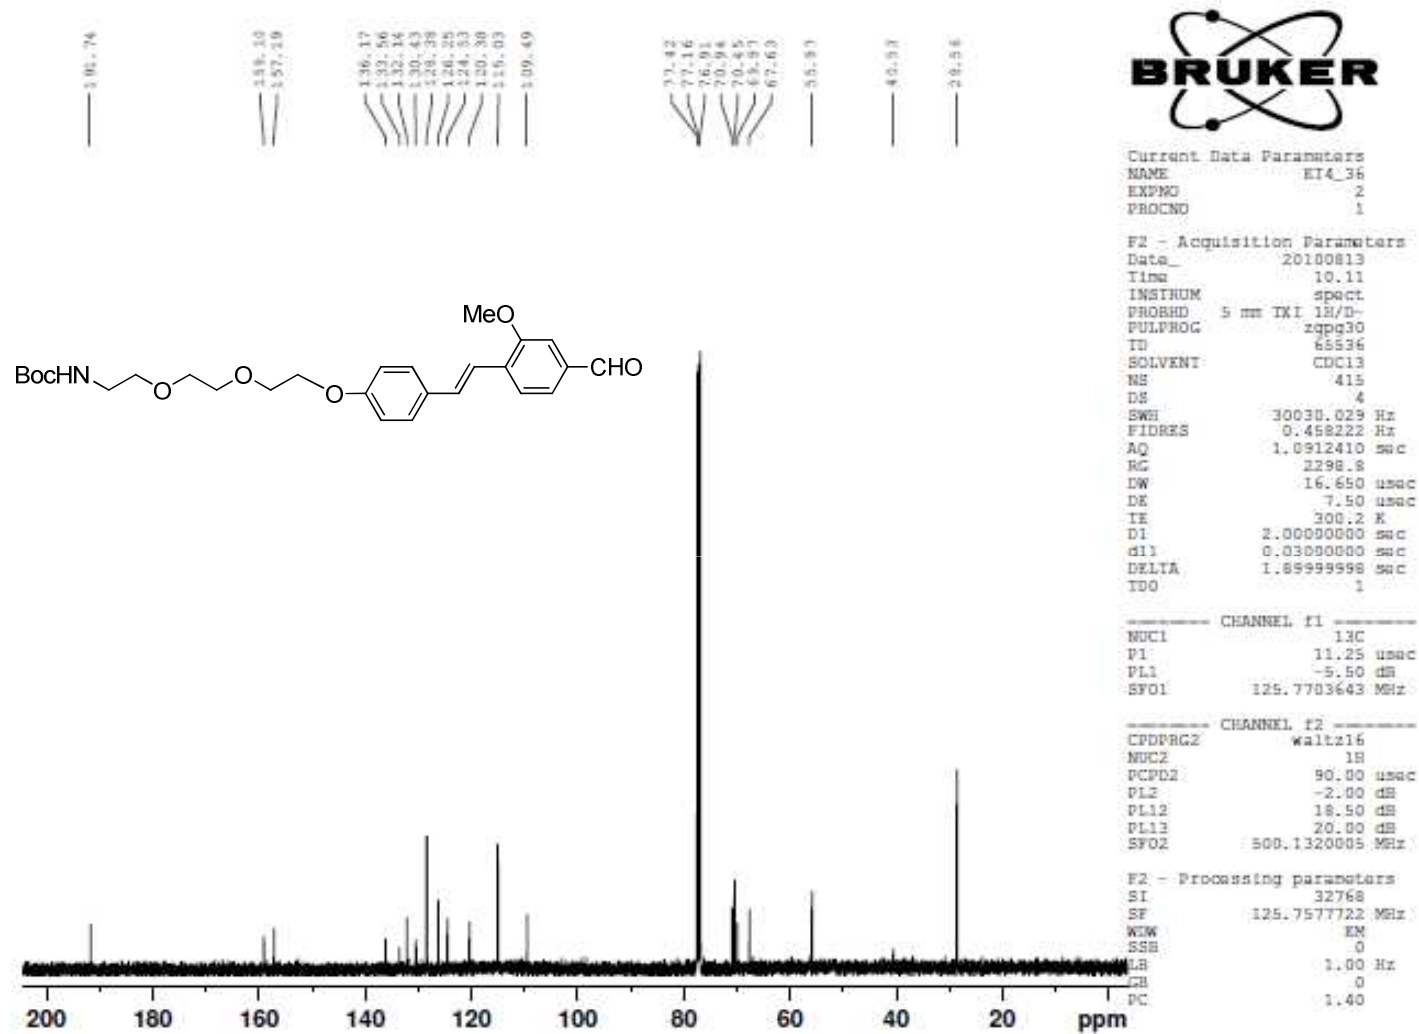

**Figure S10.** <sup>13</sup>C NMR of compound 11

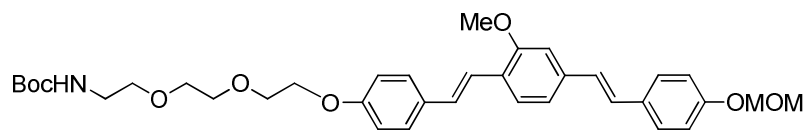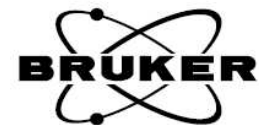

Current Data Parameters  
 NAME ET4\_80  
 EXPNO 1  
 PROCNO 1

F2 - Acquisition Parameters  
 Date\_ 20101102  
 Time 13.06  
 INSTRUM spect  
 PROBHD 5 mm TXI 1H/D-  
 PULPROG zg30  
 TD 65536  
 SOLVENT Acetone  
 NS 16  
 DS 2  
 SWH 10330.578 Hz  
 FIDRES 0.157632 Hz  
 AQ 3.1720407 sec  
 RG 50.8  
 DW 48.400 usec  
 DE 7.50 usec  
 TE 299.2 K  
 D1 1.00000000 sec  
 TD0 1

===== CHANNEL f1 =====  
 NUC1 1H  
 P1 8.75 usec  
 PL1 -2.00 dB  
 SFO1 500.1330885 MHz

F2 - Processing parameters  
 SI 32768  
 SF 500.1300094 MHz  
 WDW EM  
 SSB 0  
 LB 0.30 Hz  
 GB 0  
 PC 1.00

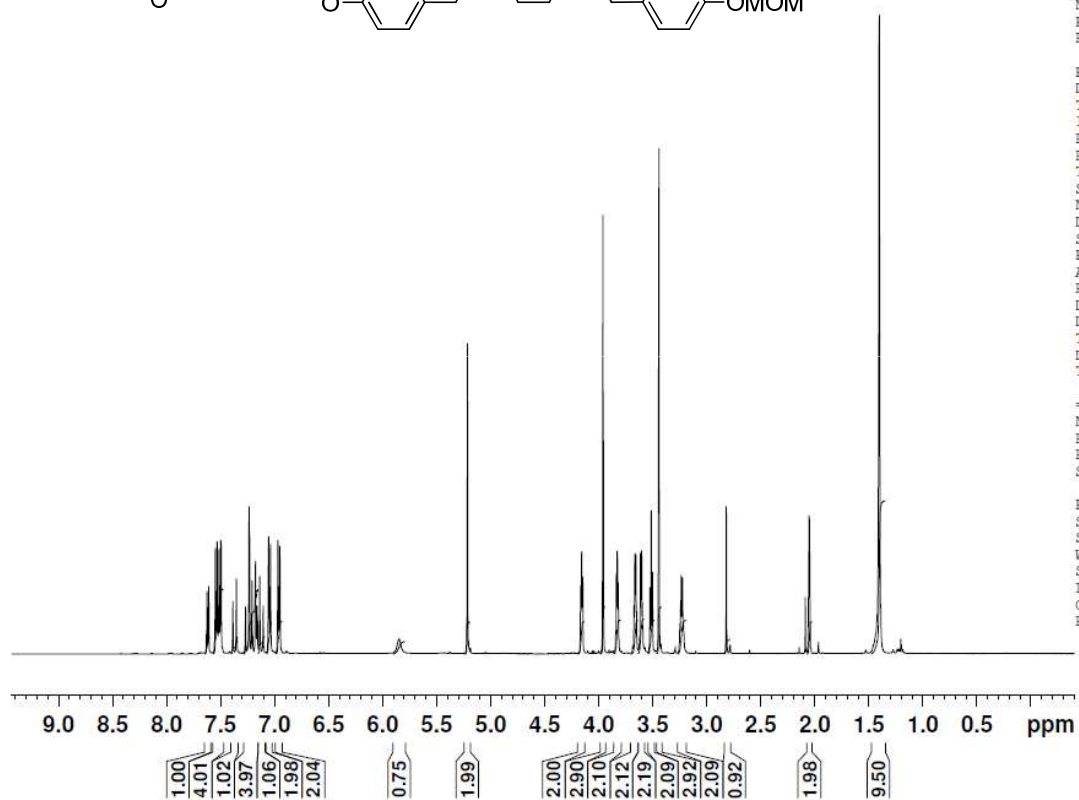

Figure S11. <sup>1</sup>H NMR of compound 12

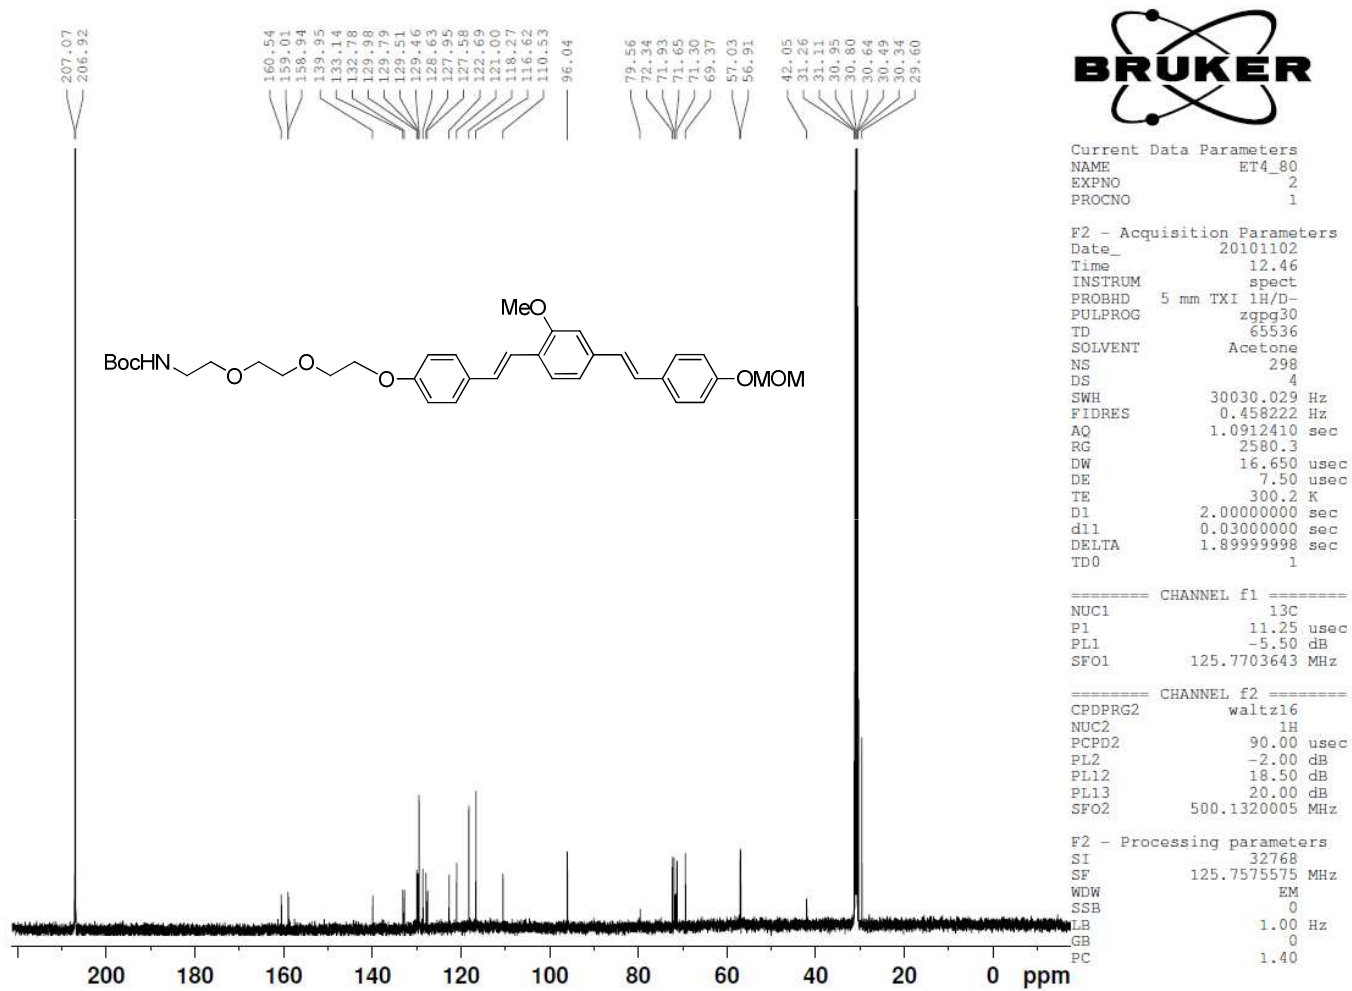

**Figure S12.**  $^{13}\text{C}$  NMR of compound 12

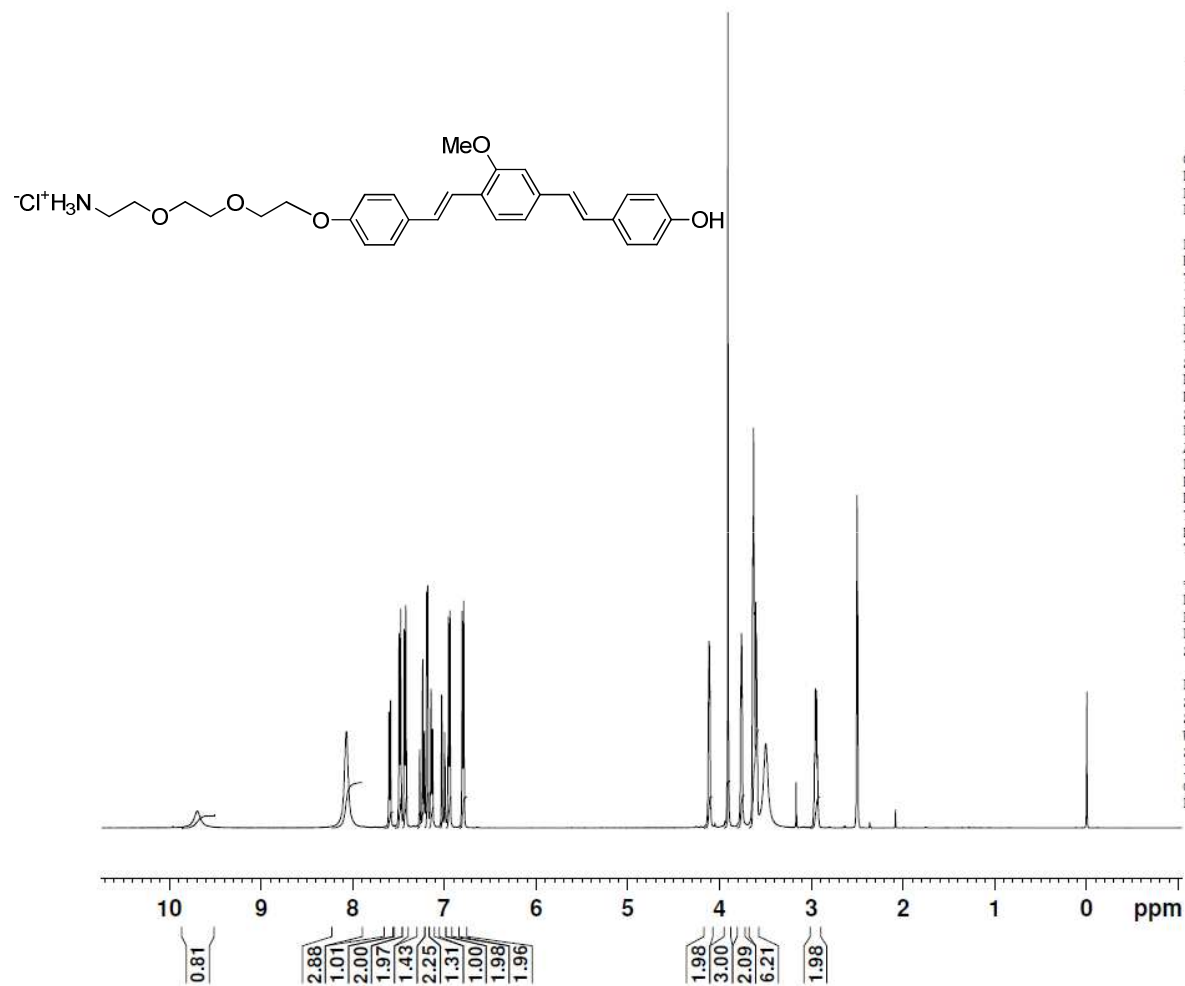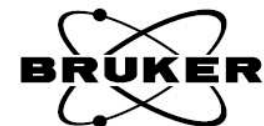

Current Data Parameters  
 NAME ET4\_82  
 EXPNO 1  
 PROCNO 1

F2 - Acquisition Parameters  
 Date\_ 20101102  
 Time 11.40  
 INSTRUM spect  
 PROBHD 5 mm TXI 1H/D-  
 PULPROG zg30  
 TD 65536  
 SOLVENT DMSO  
 NS 16  
 DS 2  
 SWH 10330.578 Hz  
 FIDRES 0.157632 Hz  
 AQ 3.1720407 sec  
 RG 128  
 DW 48.400 usec  
 DE 7.50 usec  
 TE 299.2 K  
 D1 1.00000000 sec  
 TD0 1

===== CHANNEL f1 =====  
 NUC1 1H  
 P1 8.75 usec  
 PL1 -2.00 dB  
 SFO1 500.1330885 MHz

F2 - Processing parameters  
 SI 32768  
 SF 500.1300049 MHz  
 WDW EM  
 SSB 0  
 LB 0.30 Hz  
 GB 0  
 PC 1.00

Figure S13.  $^1\text{H}$  NMR of compound 13

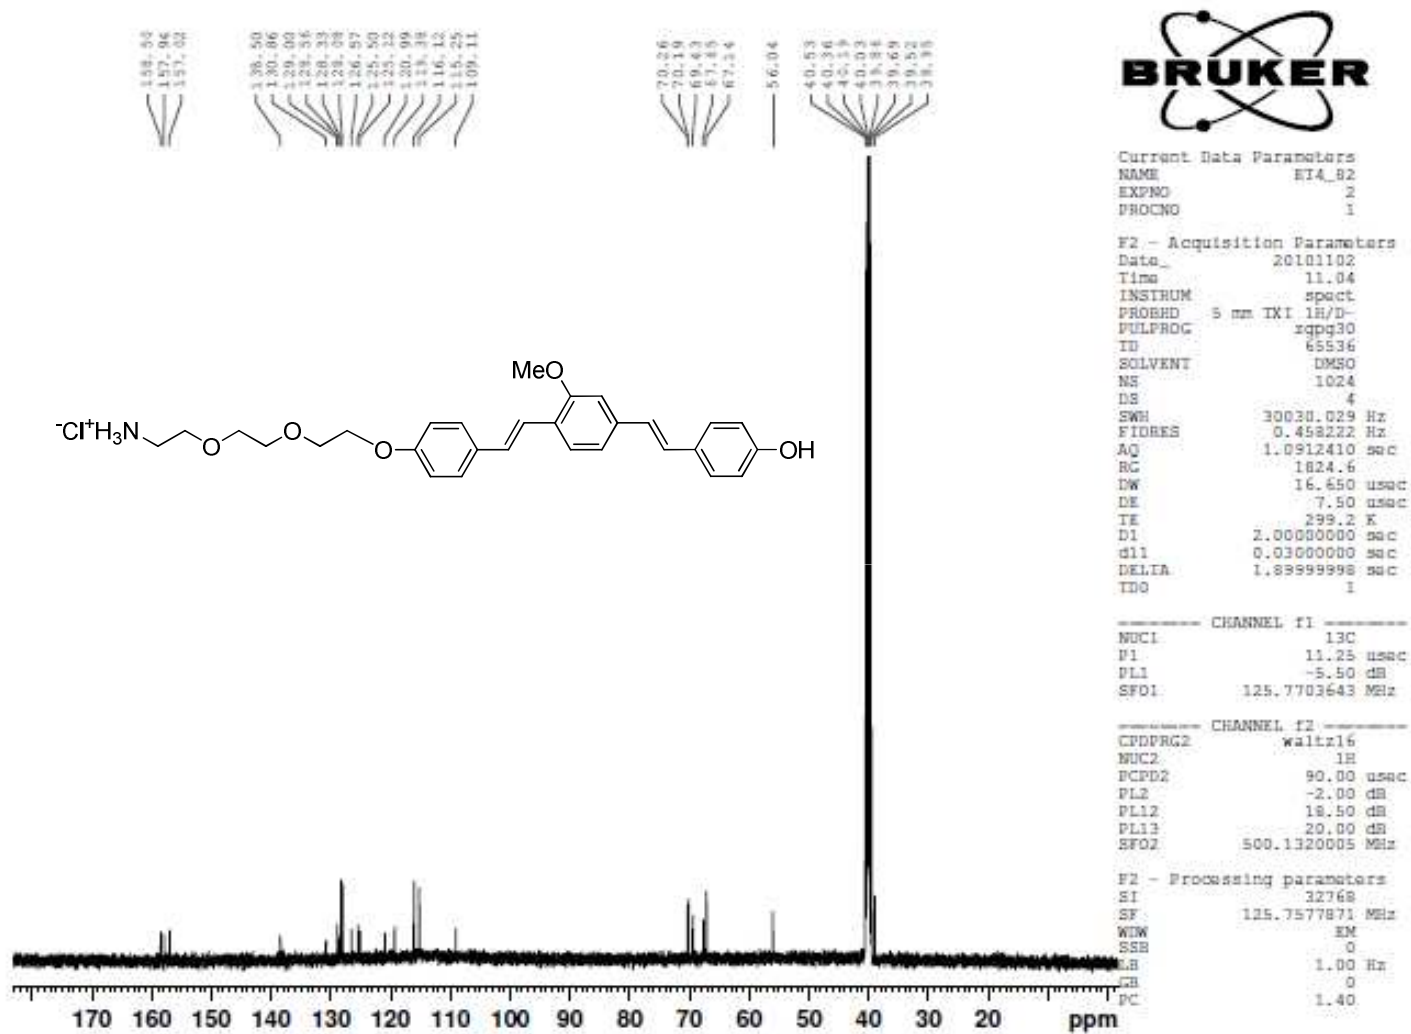

**Figure S14.**  $^{13}\text{C}$  NMR of compound 13

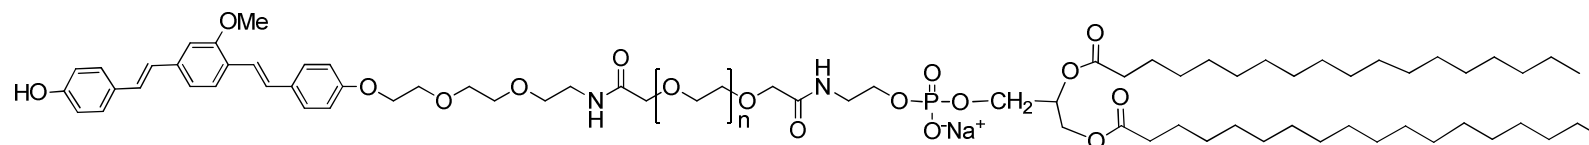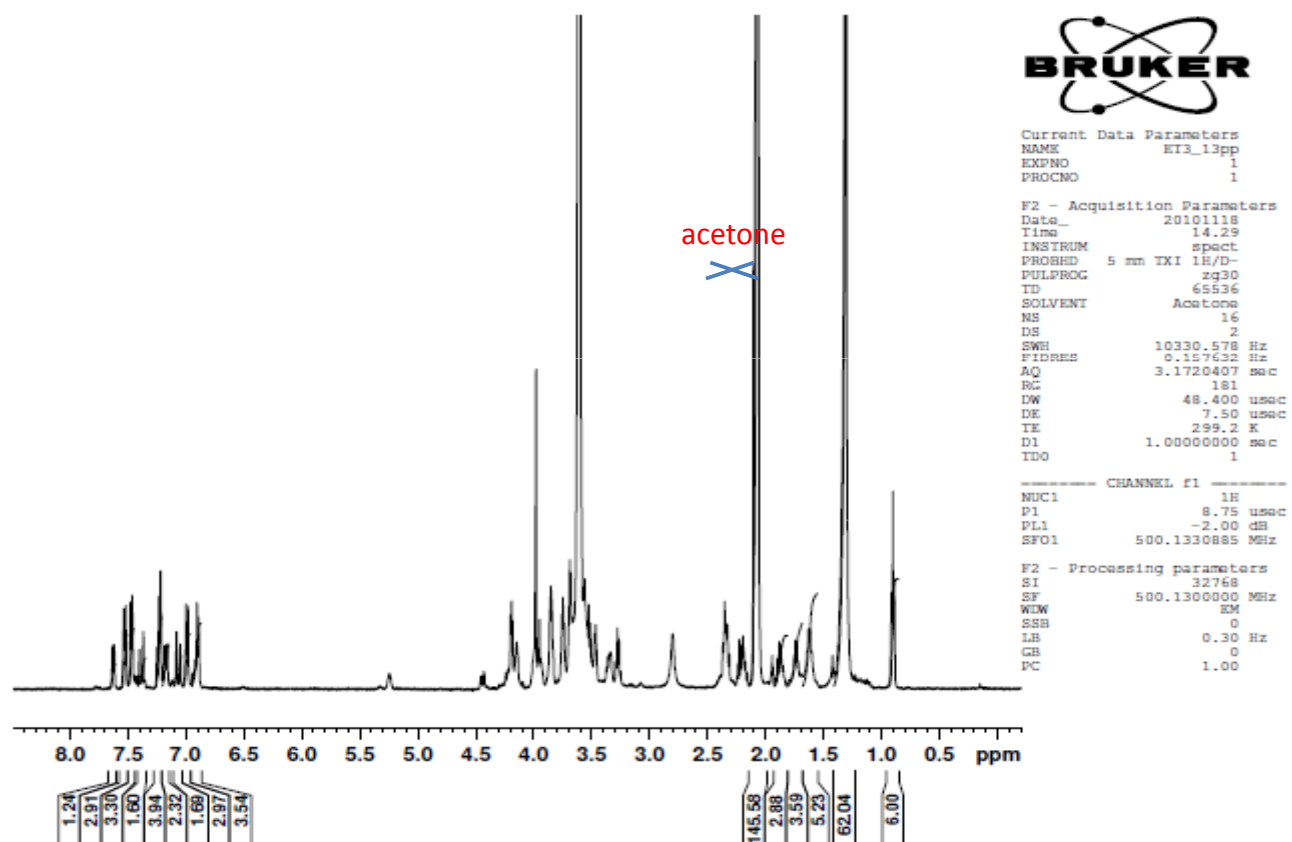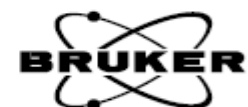

```

Current Data Parameters
NAME      ET3_13pp
EXPNO     1
PROCNO    1

F2 - Acquisition Parameters
Date_     20101118
Time      14.29
INSTRUM   spect
PROBHD    5 mm TXI 1H/D-
PULPROG   zg30
ID         65536
SOLVENT   Acetone
NS         16
DS         2
SWH        10330.578 Hz
FIDRES     0.157632 Hz
AQ         3.1720407 sec
RG         181
DW         48.400 usec
DE         7.50 usec
TE         299.2 K
D1         1.00000000 sec
TD         1

----- CHANNEL f1 -----
NUC1       1H
P1         8.75 usec
PL1        -2.00 dB
SFO1       500.1330885 MHz

F2 - Processing parameters
SI         32768
SF         500.1300000 MHz
WDW        EM
SSB        0
LB         0.30 Hz
GB         0
PC         1.00

```

**Figure S15.**  $^1\text{H}$  NMR of DSPE-PEG<sub>3400</sub>-MeXO4 (1)



D:\Data\2010\Dec 2010\M120110\16096 ET3-1310\_O10\1

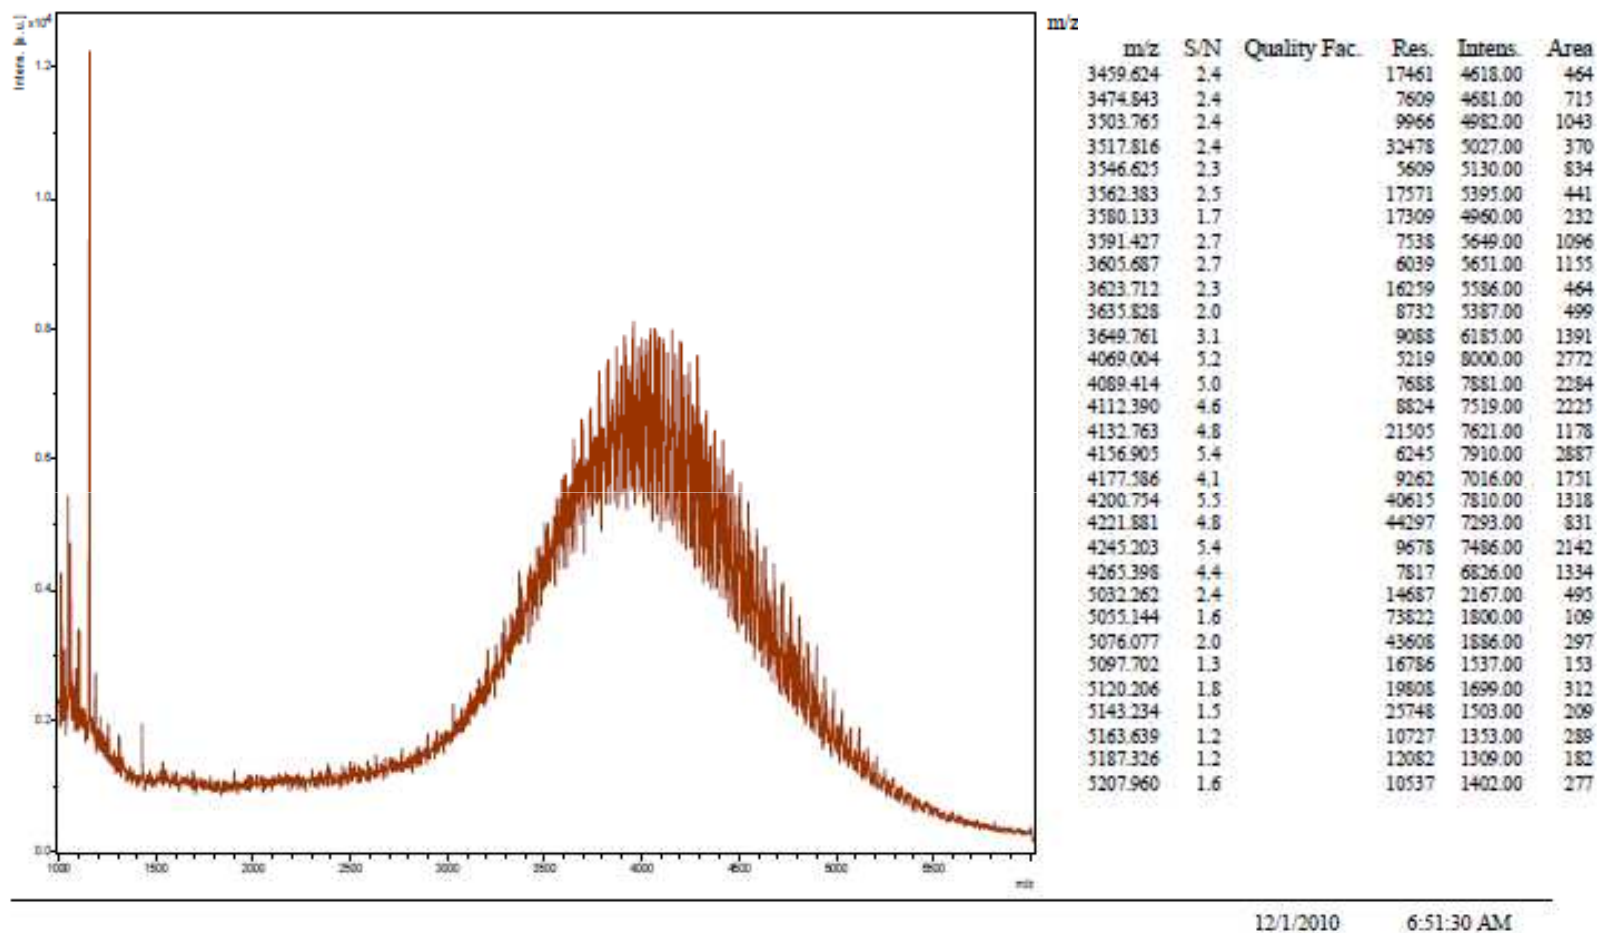

**Figure S16.** MALDI spectrum of DSPE-PEG<sub>3400</sub>-MeXO4 (1)

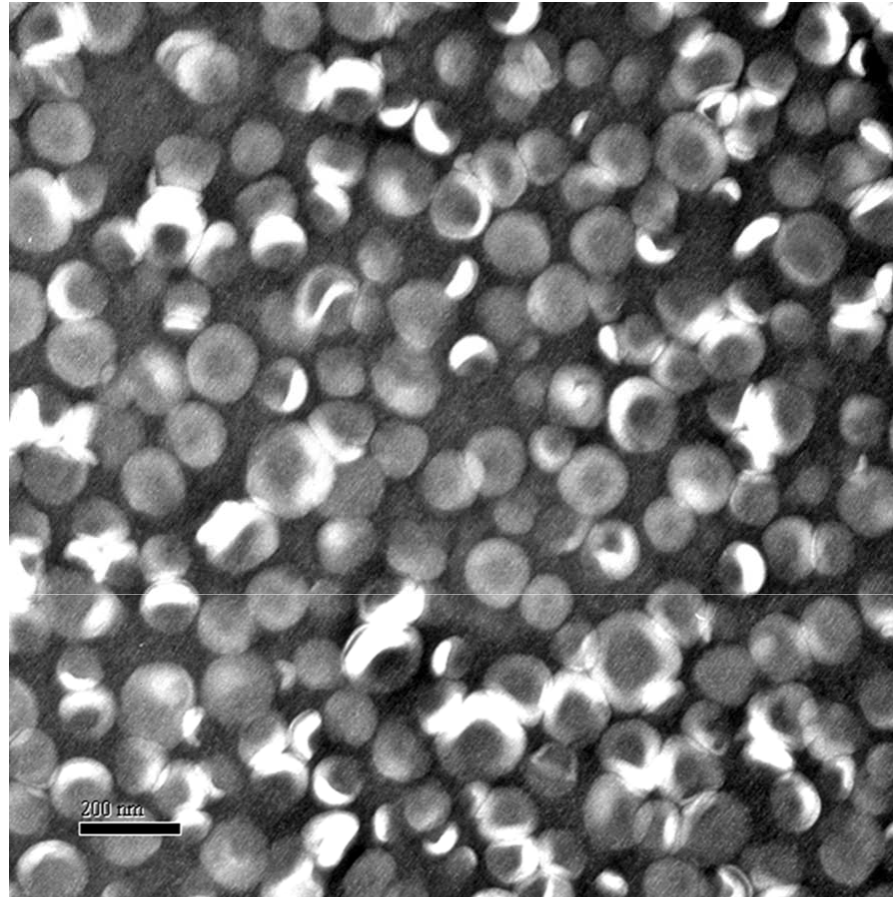

**Figure S17.** Negative Stain TEM of targeted liposomes. Grid with sample was incubated with Uranyl Acetate for 2 minutes 3 times, followed by imaging at 80kV. Exposure time was 0.9 seconds, effective magnification 12000x.

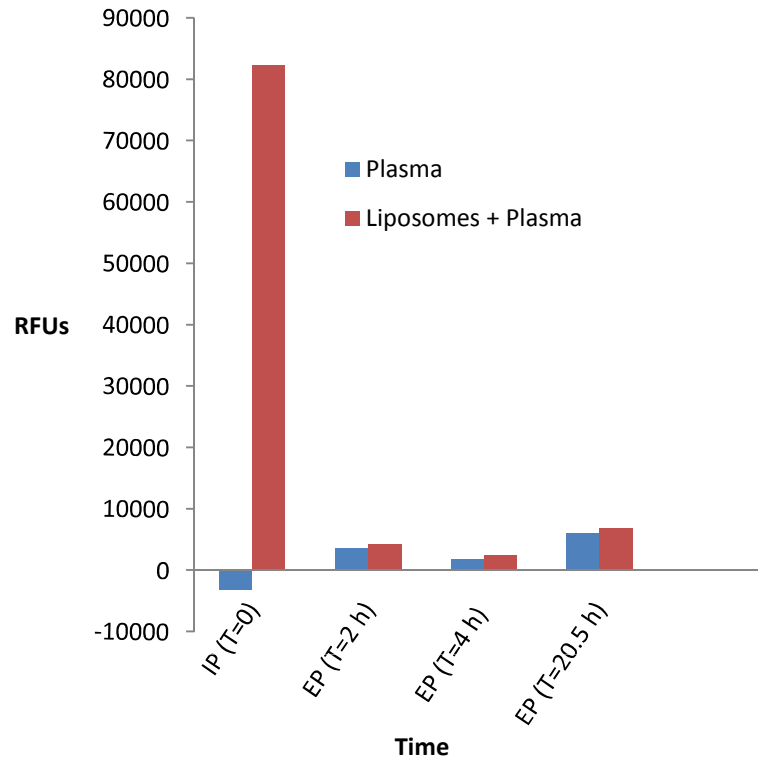

**Figure S18.** Liposome stability-Plasma leak test results: To evaluate the stability of the particles in plasma, 300  $\mu\text{L}$  of the targeted liposomal preparation was added to 1 mL of bovine plasma in histidine/saline buffer (10 mM, pH 7.4) and incubated at 37  $^{\circ}\text{C}$  for 90 min. This mixture (internal phase, IP) was placed in a dialysis cassette (100,000 MWCU) and dialyzed against 100 mL of buffer (external phase, EP). 1 mL plasma was subjected to the same protocol to serve as control. At the start of the dialysis 3  $\mu\text{L}$  each of the internal phase of both test and plasma (control) were diluted to 300  $\mu\text{L}$  in ethanol and the fluorescence of the resulting mixture measured at 450 nm (IP, T=0). The fluorescence of 300  $\mu\text{L}$  samples taken from the external phase of both test and control were measured as 2 h, 4 h, and 20.5 h time points (EP, T=2 h; EP, T=4 h; EP, T=20.5 h) respectively. As can be seen from the data above, the integrity of the liposomes remains intact during the course of the experiment as disintegration of the particles would have resulted in a spike in fluorescence in the external phase.
